# Supplementary material
Source: PubMed Central journal article supplement (PMC5468365)
Supplement: NIHMS855182-supplement-Supplemental_Material.pdf [file NIHMS855182-supplement-Supplemental_Material.pdf]

**Supporting information for:**  
**On the Possibility of Facilitated Diffusion of**  
**Dendrimers Along DNA**

Emel Ficici and Ioan Andricioaei\*

*Department of Chemistry, University of California, Irvine, CA 92697*

E-mail: andricio@uci.edu

---

\*To whom correspondence should be addressed

NMR order parameters ( $S^2$ ) for dendrimer N-H bonds at various dendrimer positions around DNA, as specified by pseudo dihedral angle values ( $\phi$ ), are shown in Figures *S2* – *S7* for systems *r25*, *r35*, and *r45*, respectively. Color coding is based on dendrimer generation (See Figure 8(a) in the main article).  $S^2$  values calculated from equilibrium expression (Figures *S3*, *S5*, and *S7*) and from the tail values of N-H bond autocorrelation functions (Figures *S2*, *S4*, and *S6*) are given below. Sample autocorrelation functions for select residues can be seen in Figure *S1*.

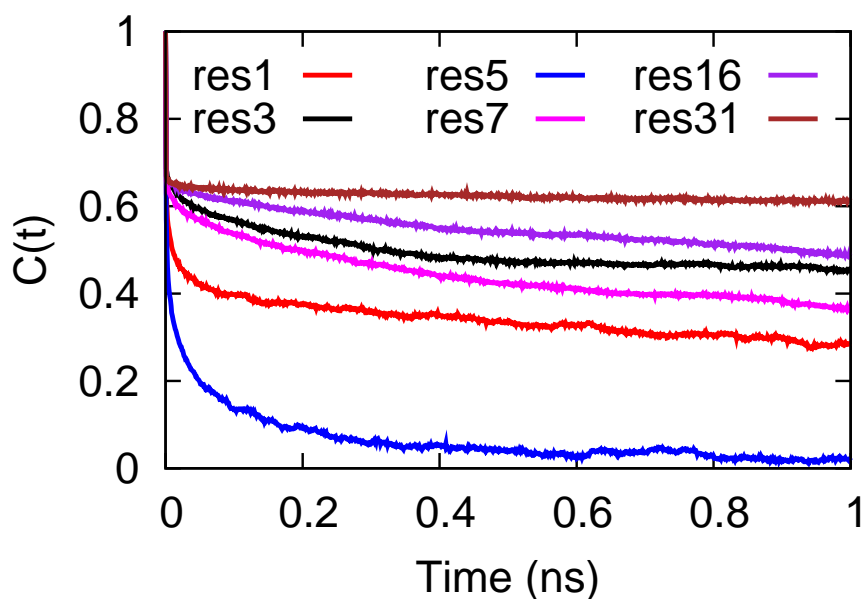

Figure S1: Sample correlation functions.

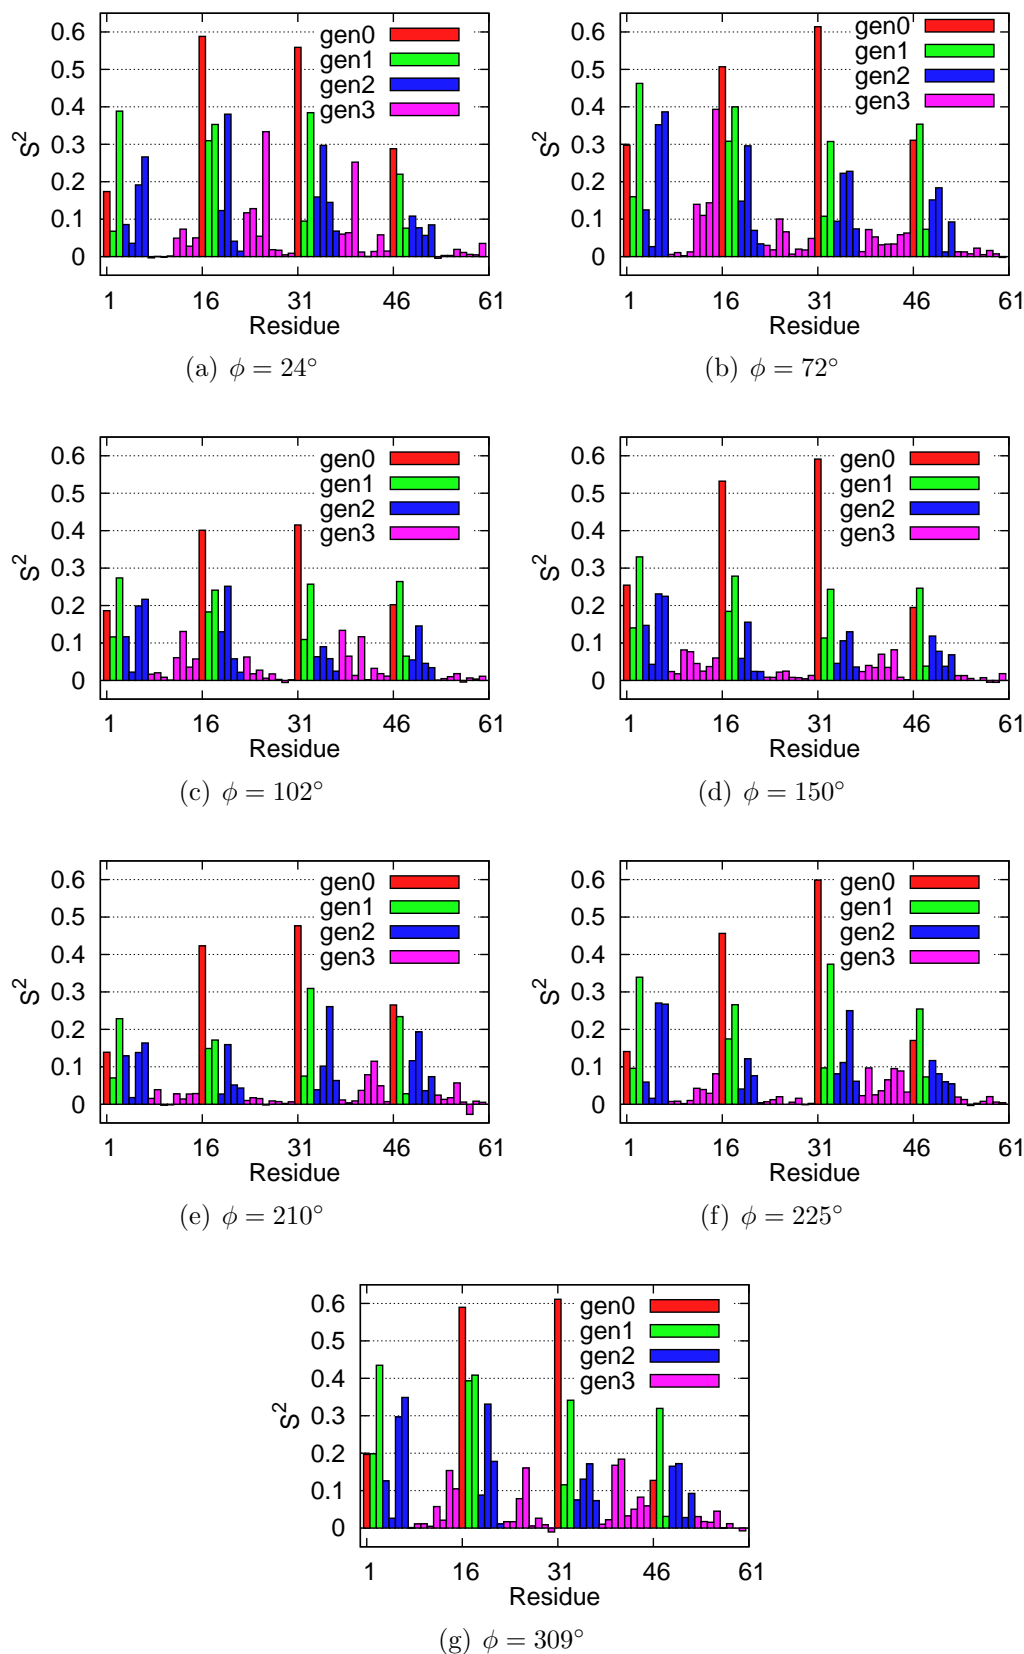

Figure S2:  $S^2$  values as calculated from the tail of autocorrelation functions for system  $r25$ .

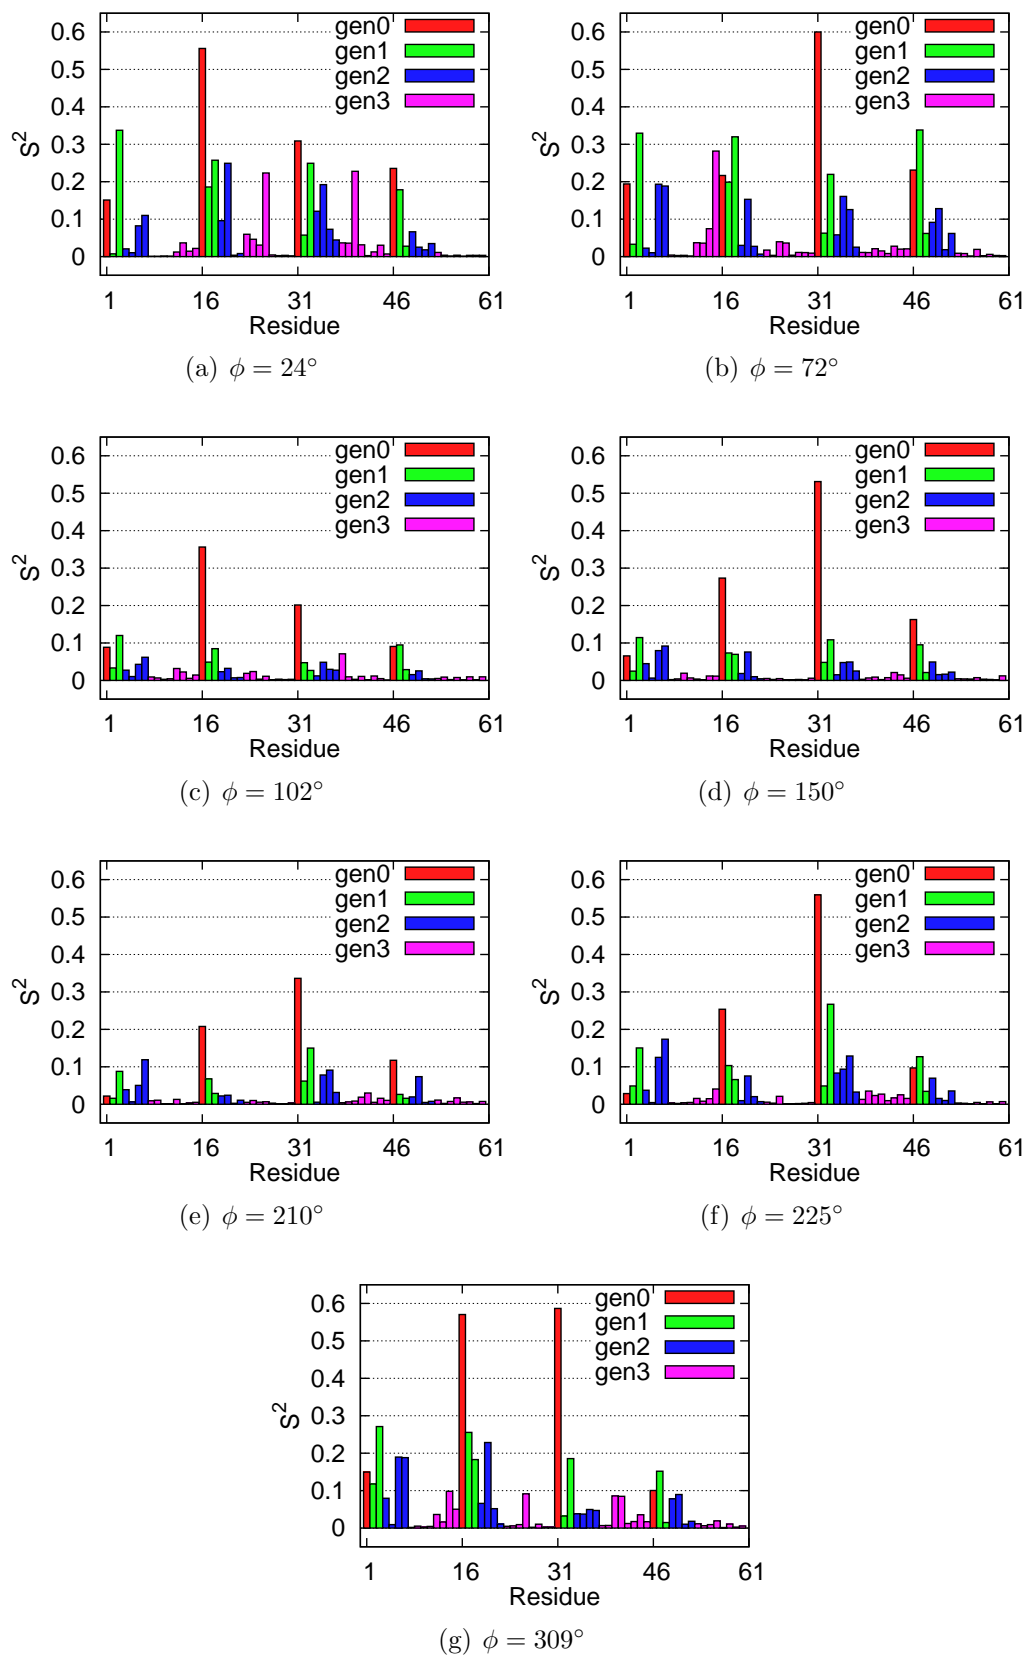

Figure S3:  $S^2$  values as calculated from the equilibrium expression for system  $r25$ .

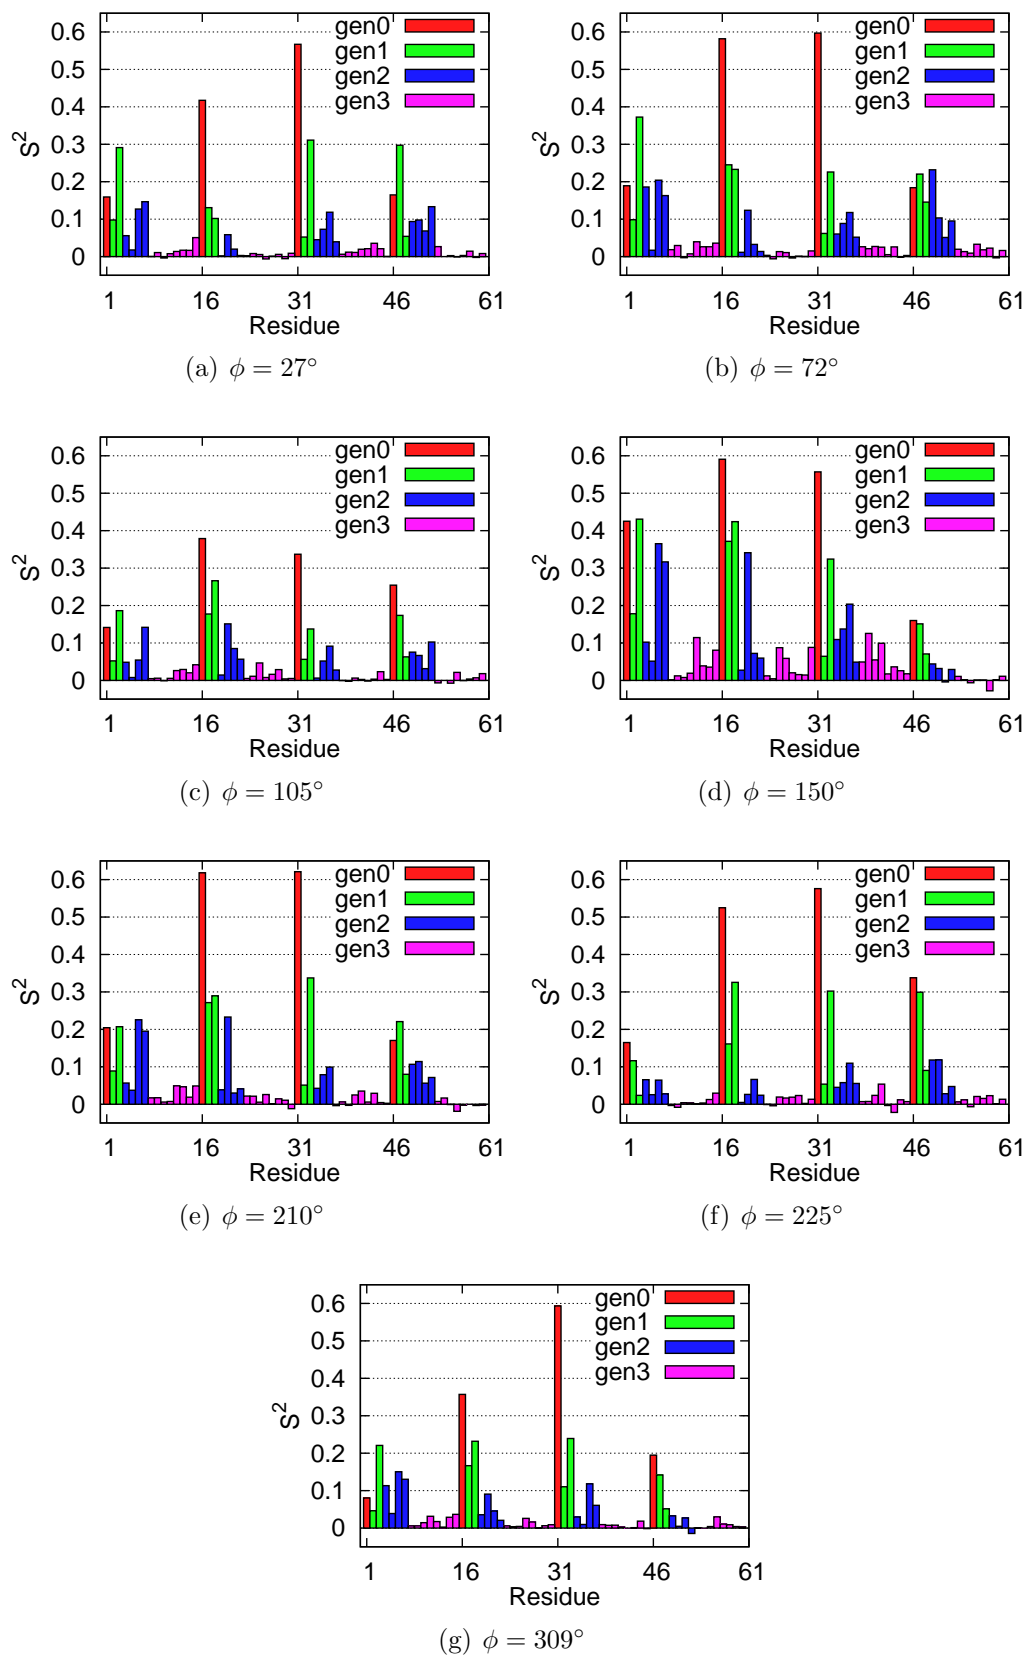

Figure S4:  $S^2$  values as calculated from the tail of autocorrelation functions for system  $r35$ .

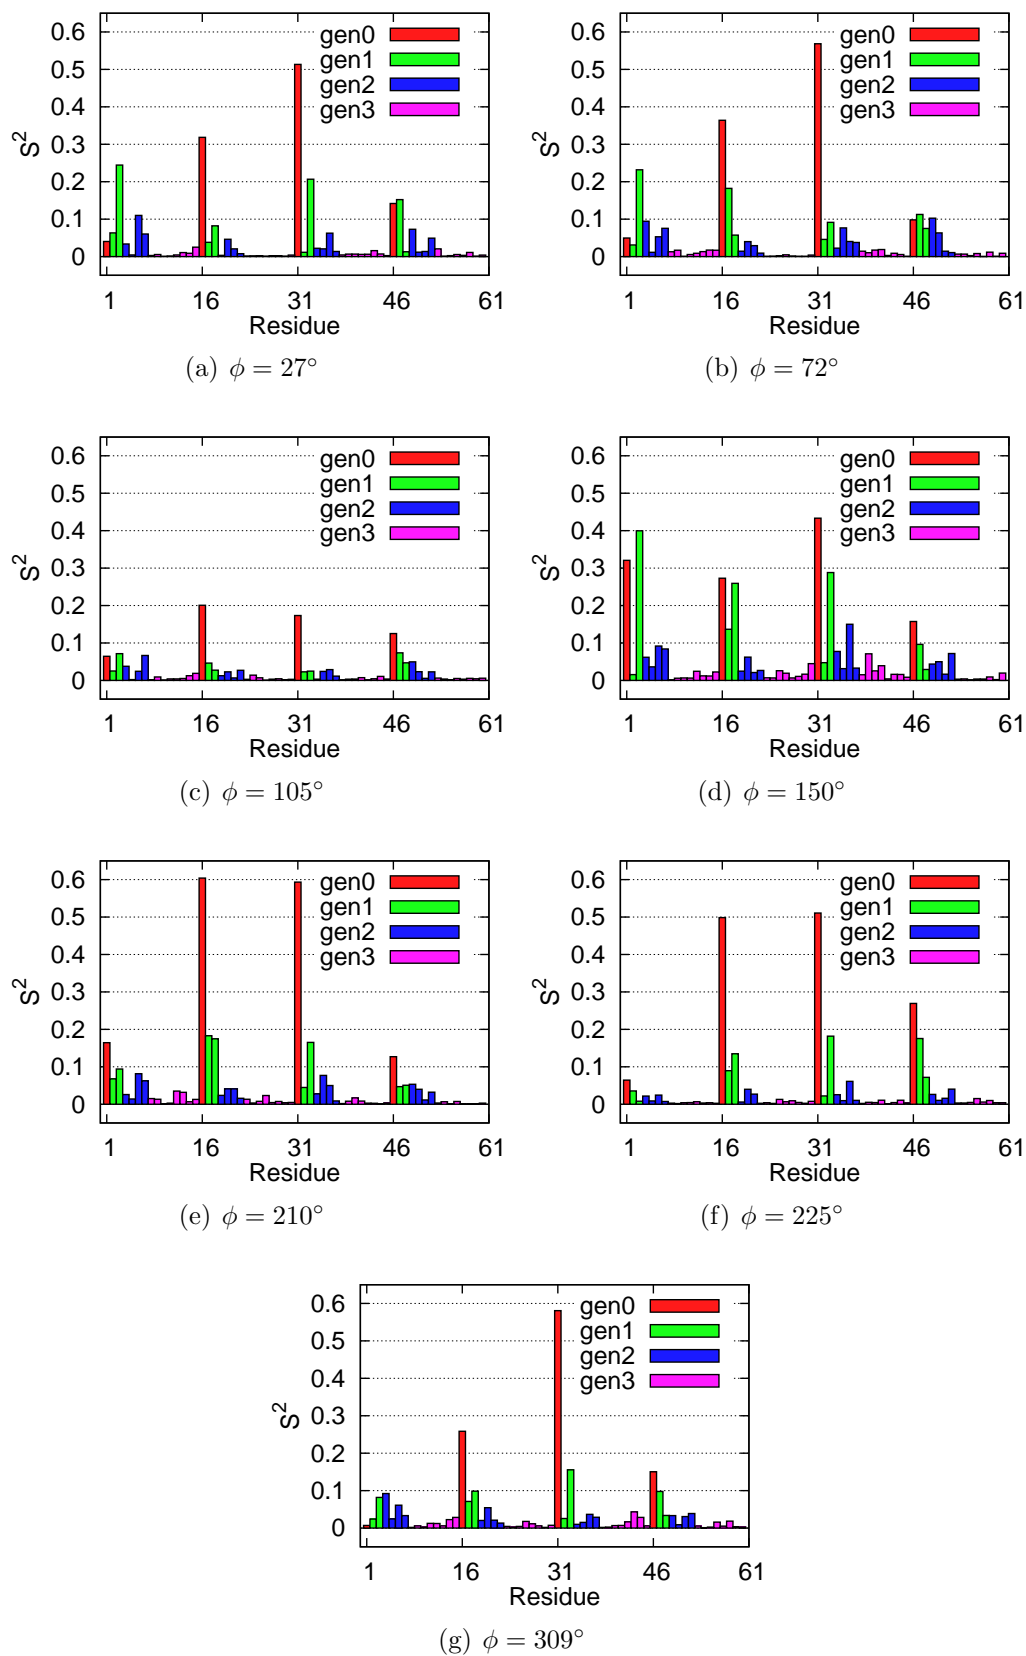

Figure S5:  $S^2$  values as calculated from the equilibrium expression for system  $r35$ .

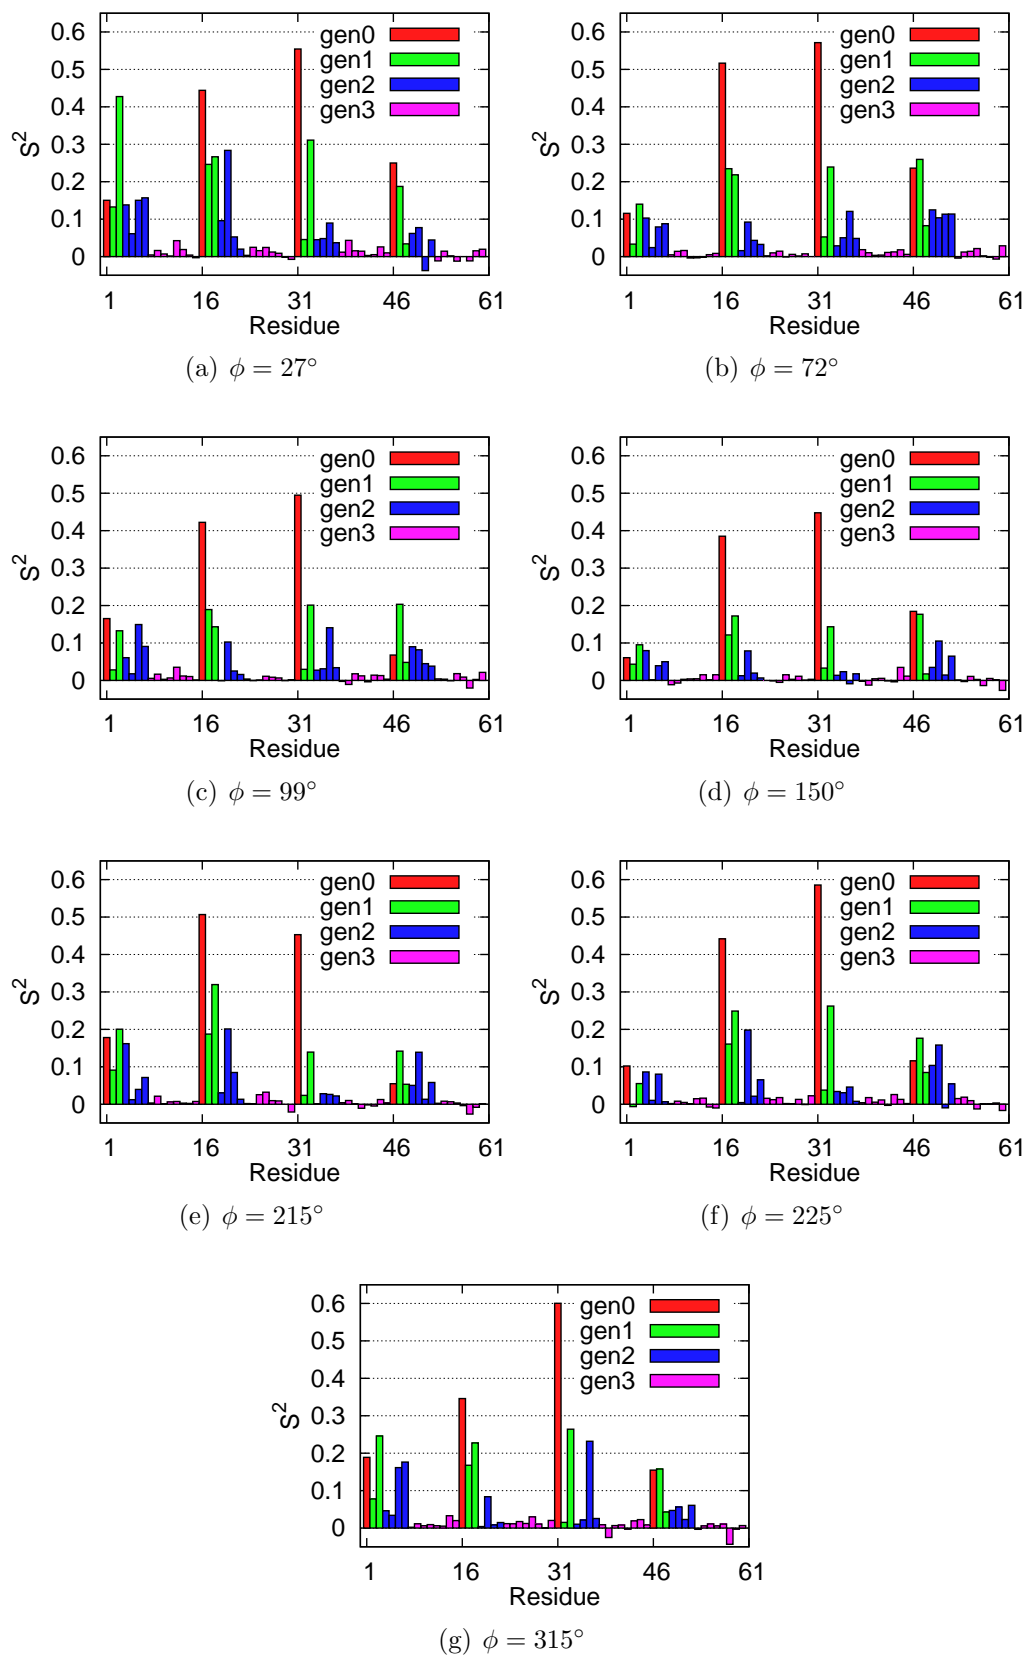

Figure S6:  $S^2$  values as calculated from the tail of autocorrelation functions for system  $r45$ .

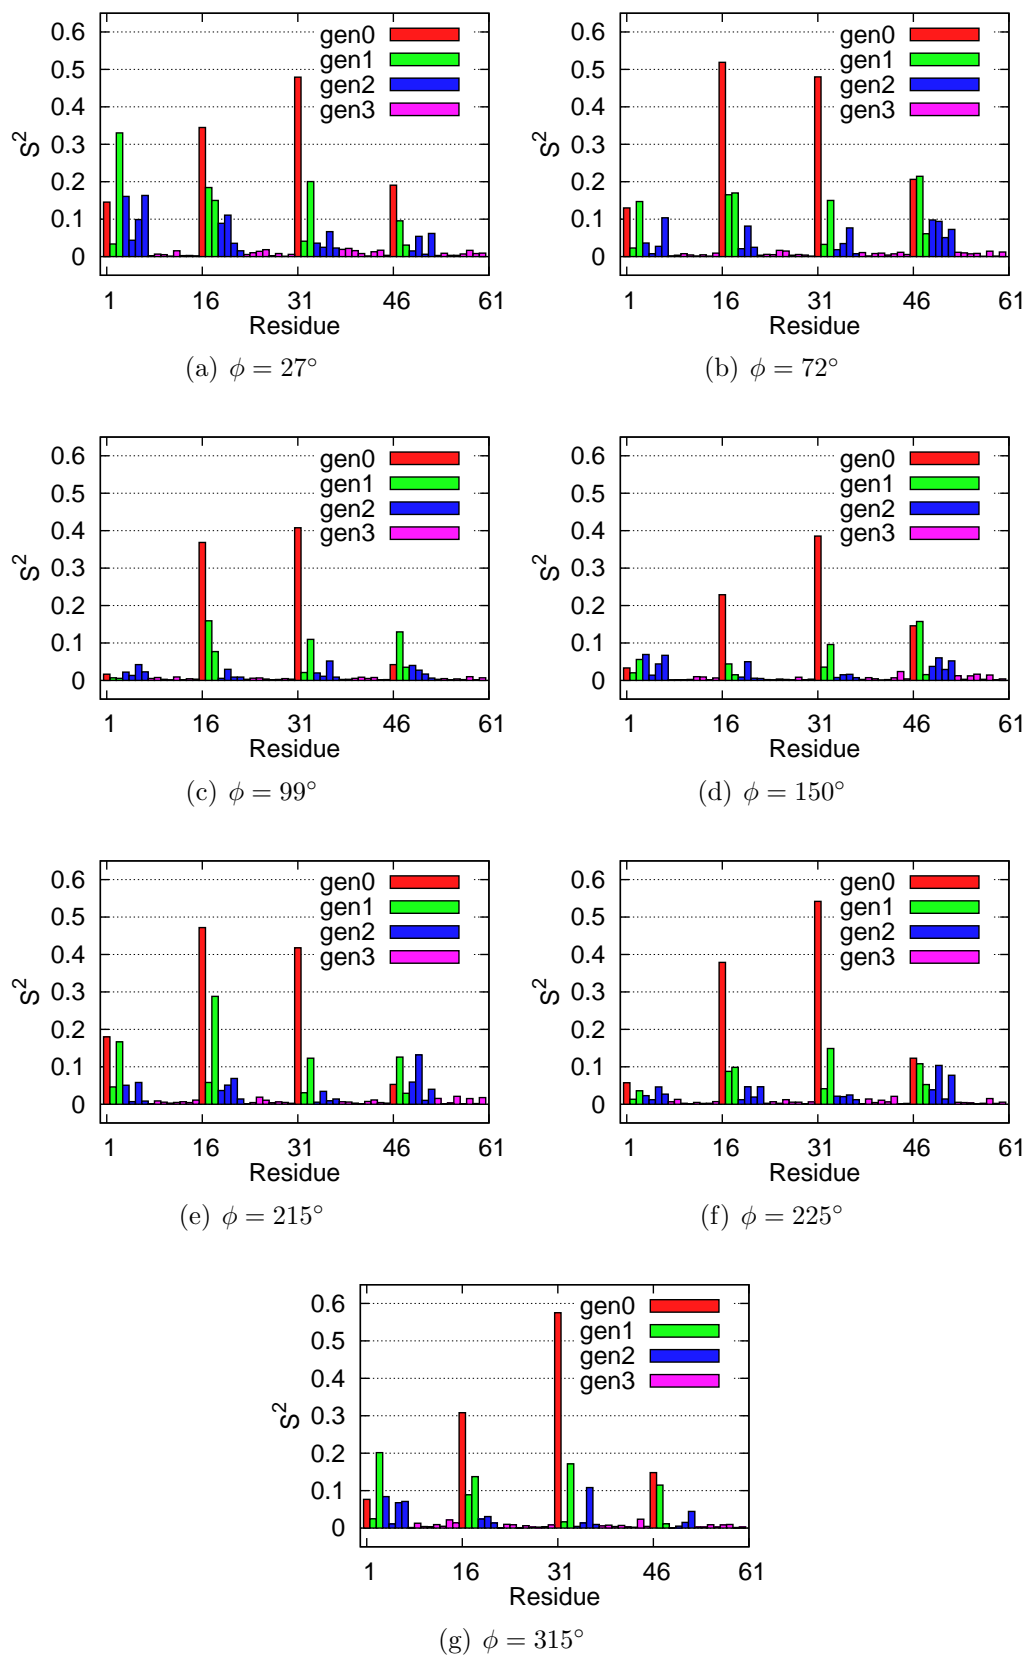

Figure S7:  $S^2$  values as calculated from the equilibrium expression for system *r45*.
